# Supplementary material for: Ultrafast solid-state lithium ion conductor through alloying induced lattice softening of Li6PS5Cl
Source: Royal Society of Chemistry journal article supplement (doi:10.1039/c8ta07240j), 2018-01-01
Supplement: c8ta07240j1.pdf [file c8ta07240j1.pdf]

## **Ultrafast solid-state lithium ion conductor through alloying induced lattice softening of $\text{Li}_6\text{PS}_5\text{Cl}$**

Minjie Xuan,<sup>a,b</sup> Weidong Xiao,<sup>a,b</sup> Hongjie Xu,<sup>a,b</sup> Yonglong Shen,<sup>a,b</sup> Zhenzhen Li,<sup>a</sup> Shijie Zhang,<sup>a,b</sup> Zhuo Wang\*<sup>a,b</sup> and Guosheng Shao\*<sup>a,b</sup>

<sup>a</sup>State Centre for International Cooperation on Designer Low-carbon & Environmental Materials (CDLCEM), Zhengzhou University, 100 Kexue Avenue, Zhengzhou 450001, China.

<sup>b</sup>Zhengzhou Materials Genome Institute (ZMGI), Building 2, Zhongyuanzhigu, Xinyang, Zhengzhou 450100, China

\*Corresponding author emails: [gsshao@zzu.edu.cn](mailto:gsshao@zzu.edu.cn); [wangzh@zzu.edu.cn](mailto:wangzh@zzu.edu.cn)

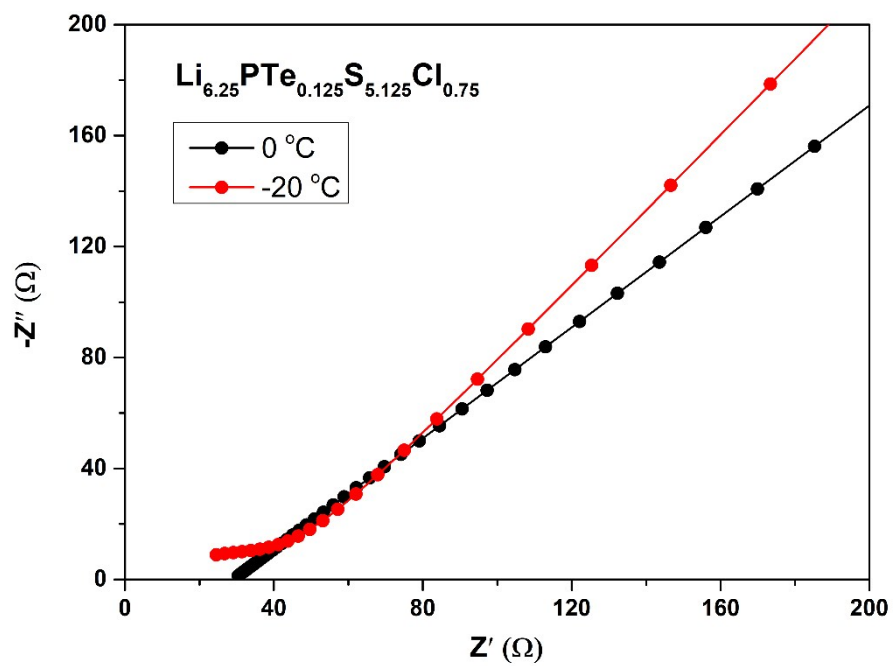

**Fig. S1** Temperature dependence of impedance for the Li<sub>6.25</sub>PTe<sub>0.125</sub>S<sub>5.125</sub>Cl<sub>0.75</sub> alloy, at -20 and 0 °C.

### Preparation of all-solid-state cell

The whole preparation process was carried out under an argon atmosphere inside a glove box. The flow delay coating method was used to prepare cathode and electrolyte separator of the all-solid-state cell. Thin plates of lithium were used as anode.

The preparation of cathode coating:

The cathode consisted of  $\text{LiFePO}_4$  powder, acetylene black powder and a certain amount of poly(vinylidene fluoride) (PVDF) as an organic binder in a 70:20:10 (wt%) ratio. These materials were mixed in a ball miller with N-methyl-2-pyrrolidone (NMP) solvent. Then the slurry was coated on the aluminum foil with a thickness of  $40\mu\text{m}$ , which was then heated at  $120^\circ\text{C}$  to remove NMP.

Preparation of electrolyte separator coating:

Electrolyte separator consisted of  $\text{Li}_{6.25}\text{PTe}_{0.125}\text{S}_{5.125}\text{Cl}_{0.75}$  and PVDF in a 90:10 (wt%) ratio. The mixture was mixed in a ball miller with NMP solvent. Then the slurry was coated on the cathode coating with the thickness of  $20\mu\text{m}$ .

The preparation of all-solid-state cell:

The aluminum foil with cathode and electrolyte coatings were pressed together and then punched into a disc with a diameter of 19 mm, which was then stacked with a lithium plate under pressure to make a CR2025 cell.

### Charge and discharge measurements

The charge and discharge experiments of the all-solid-state cells ( $\text{LiFePO}_4$  loading:  $4.5\text{ mg/cm}^2$ ) were conducted between 2.5 and 3.8 V. The cycling characteristics at  $25^\circ\text{C}$  were examined at a current density of  $0.02\text{ mAcm}^{-2}$  ( $0.026\text{C}$ ) at the first cycle and then  $0.08\text{ mAcm}^{-2}$  ( $0.1\text{C}$ ) for later cycles. The electrochemical properties of the cells were determined using a battery-testing instrument (LAND CT2001A), with results plotted in Fig. S2.

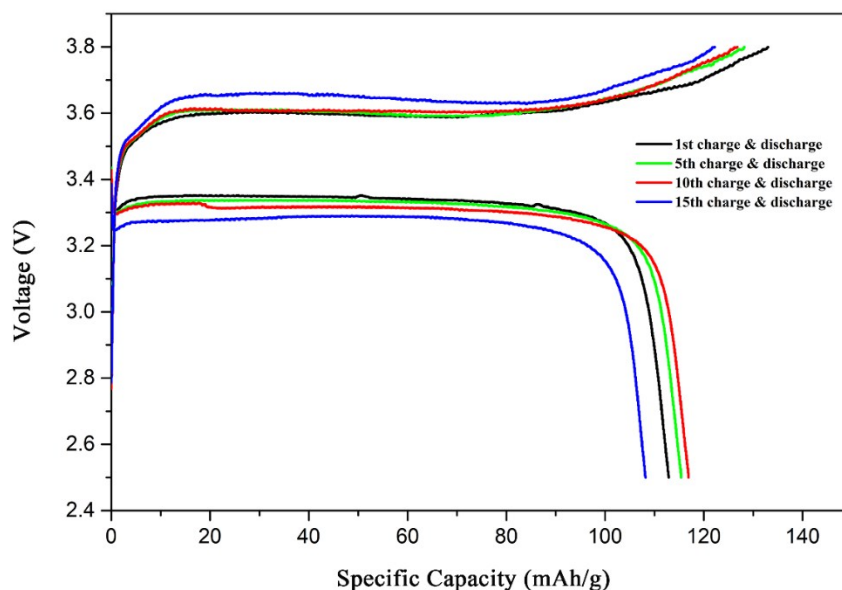

**Fig. S2** Charge-discharge performance of  $\text{LiFePO}_4/\text{Li}_{6.25}\text{PTe}_{0.125}\text{S}_{5.125}\text{Cl}_{0.75}/\text{Li}$  cell.

**Table S1** Key parameters corresponding to each element in the equivalent circuits shown in Fig. 6.

| Material                                                                          | Equivalent Circuit                                             | Element                  | Value                  | $\sigma_{\text{total}}$ at 25°C (mS cm <sup>-1</sup> ) |
|-----------------------------------------------------------------------------------|----------------------------------------------------------------|--------------------------|------------------------|--------------------------------------------------------|
| Li <sub>6</sub> PS <sub>5</sub> Cl                                                | R <sub>0</sub> (R <sub>1</sub> Q <sub>1</sub> )W <sub>0</sub>  | R <sub>0</sub>           | 6.2                    | 0.28                                                   |
|                                                                                   |                                                                | T <sub>Q1</sub>          | 3.066×10 <sup>-6</sup> |                                                        |
|                                                                                   |                                                                | P <sub>Q1</sub>          | 0.8969                 |                                                        |
|                                                                                   |                                                                | R <sub>1</sub>           | 260                    |                                                        |
|                                                                                   |                                                                | R <sub>W0</sub>          | 282.4                  |                                                        |
|                                                                                   |                                                                | T <sub>W0</sub>          | 0.16816                |                                                        |
|                                                                                   |                                                                | P <sub>W0</sub>          | 0.43663                |                                                        |
|                                                                                   |                                                                | <b>R<sub>total</sub></b> | <b>266.2</b>           |                                                        |
| Li <sub>6.25</sub> PS <sub>5.25</sub> Cl <sub>0.75</sub>                          | R <sub>0</sub> (R <sub>1</sub> Q <sub>1</sub> ) W <sub>0</sub> | R <sub>0</sub>           | 14.5                   | 1.03                                                   |
|                                                                                   |                                                                | T <sub>Q1</sub>          | 6.23×10 <sup>-6</sup>  |                                                        |
|                                                                                   |                                                                | P <sub>Q1</sub>          | 0.61314                |                                                        |
|                                                                                   |                                                                | R <sub>1</sub>           | 58                     |                                                        |
|                                                                                   |                                                                | R <sub>W0</sub>          | 19.2                   |                                                        |
|                                                                                   |                                                                | T <sub>W0</sub>          | 1.476×10 <sup>-4</sup> |                                                        |
|                                                                                   |                                                                | P <sub>W0</sub>          | 0.27911                |                                                        |
|                                                                                   |                                                                | <b>R<sub>total</sub></b> | <b>72.5</b>            |                                                        |
| Li <sub>6.25</sub> PTe <sub>0.125</sub> S <sub>5.125</sub> Cl <sub>0.7</sub><br>5 | R <sub>0</sub> W <sub>0</sub>                                  | R <sub>0</sub>           | 16.56                  | 4.5                                                    |
|                                                                                   |                                                                | R <sub>W0</sub>          | 265                    |                                                        |
|                                                                                   |                                                                | T <sub>W0</sub>          | 0.0025                 |                                                        |
|                                                                                   |                                                                | P <sub>W0</sub>          | 0.3504                 |                                                        |
|                                                                                   |                                                                | <b>R<sub>total</sub></b> | <b>16.56</b>           |                                                        |

Impedance for constant phase element (Q) and Warburg element (W) are expressed as:

$$Z_Q = \frac{1}{T \times (j\omega)^P}$$

$$Z_W = \frac{R \times \text{ctnh}[(jT\omega)^P]}{(jT\omega)^P}$$

**Table S2** Derived electrical properties for  $\text{Li}_{6.25}\text{PS}_{5.25}\text{Cl}_{0.75}$  and  $\text{Li}_{6.25}\text{PTe}_{0.125}\text{S}_{5.125}\text{Cl}_{0.75}$ .

| $\text{Li}_{6.25}\text{PS}_{5.25}\text{Cl}_{0.75}$ |                    |                                                    | $\text{Li}_{6.25}\text{PTe}_{0.125}\text{S}_{5.125}\text{Cl}_{0.75}$ |                    |                                                    |
|----------------------------------------------------|--------------------|----------------------------------------------------|----------------------------------------------------------------------|--------------------|----------------------------------------------------|
| Temperature (°C<br>)                               | $R_{\text{total}}$ | $\sigma_{\text{total}}$<br>( $\text{mS cm}^{-1}$ ) | Temperature (°C<br>)                                                 | $R_{\text{total}}$ | $\sigma_{\text{total}}$<br>( $\text{mS cm}^{-1}$ ) |
| ---                                                | ---                | ---                                                | -20                                                                  | 46.3               | 1.6                                                |
| ---                                                | ---                | ---                                                | 0                                                                    | 30.5               | 2.45                                               |
| 25                                                 | 72.5               | 1.03                                               | 25                                                                   | 16.56              | 4.5                                                |
| 50                                                 | 56.3               | 1.33                                               | 40                                                                   | 13.91              | 5.37                                               |
| 60                                                 | 45                 | 1.66                                               | 60                                                                   | 11.81              | 6.32                                               |
| 80                                                 | 37.5               | 1.99                                               | 80                                                                   | 7.71               | 9.68                                               |
| 100                                                | 30                 | 2.99                                               | 100                                                                  | 6.33               | 11.7                                               |
| ---                                                | ---                | ---                                                | 120                                                                  | 4.13               | 18.0                                               |

**VIDEO**

The video presented the ionic trajectories of  $\text{Li}_{6.25}\text{PTeS}_{4.25}\text{Cl}_{0.75}$  by AIMD at 1000K, in which  $\text{Li}^+$ ,  $\text{P}^{5+}$ ,  $\text{Te}^{2-}$ ,  $\text{S}^{2-}$ , and  $\text{Cl}^-$  ions are indicated by white, red, orange, yellow, and blue balls, correspondingly.
